# Supplementary material
Source: HighWire-hosted journal article supplement (https://www.cmaj.ca/highwire/filestream/58931/field_highwire_adjunct_files/0/group-housden-app_1.pdf)
Supplement: group-housden-app_1.pdf [file group-housden-app_1.pdf]

## **Appendix 1 (as supplied by the authors): Systematic review search strategy**

**Source: PubMed (Medline) 1947- Present**

**Searched on:** January 31, 2012 & February 26<sup>th</sup>, 2012

**Results:** 21,370

**Search:**

1. Group + Medical + Visit
2. "Group Medical Visit"
3. GMV
4. Shared Medical Appointments
5. "Group Appointments"
6. Group Visits
7. Diabetic Group Appointment
8. "Diabetes Group Medical"
9. "Group Visit"
10. "Group Medical clinic"
11. Diabetes + Cluster Visits
12. "Group Processes" + diabetes

**Limits:** Human Subjects

**Source:** CINAHL

**Searched on:** February 4, 2012 & February 26, 2012

**Results:** 5,175

**Search:**

1. Group Medical Visits
2. Shared Medical Appointments
3. Diabetic Group Medical
4. "Diabetic Group Medical"
5. Group Visits
6. Diabetic Group
7. Group Medical + Diabetes
8. GMV
9. "Group Medical Clinic"
10. "Diabetic Group Appointment"
11. "Diabetes Self-Management"

**Source:** Biosis

**Searched on:** February 4, 2012

**Results:** 137

**Search:**

1. "Group Medical"
2. Group Medical Visits
3. Shared Medical Appointment

4. "Diabetic Group Appointment"
5. "Diabetes Group Medical"
6. "Group Appointment"
7. "Group medical Clinic"
8. "Shared Medical"
9. February 26: "Cluster visits"

**Source:** Proquest Digital Dissertations

**Searched on:** February 5, 2012

**Results:** 14

1. "Group Medical Visits" + diabetes
2. "Shared Medical Appointments" + diabetes
3. "Diabetic Group Appointment"
4. "Cluster visit"

**Source:** Embase

**Searched on:** February 5, 2012

**Results:** 3900

1. "Group medical Visit"
2. "Diabetic Group Appointment"
3. "Diabetes Group appointment"
4. "Group Visits"
5. "Group Appointments"
6. "Shared Medical Appointment"
7. "GMV"
8. "Diabetic Group Appointment"
9. "Diabetic Group"
10. "Group Medical Clinic"
11. "Chronic Care Clinics"
12. "Cluster visit"

Removed "map term to subject heading"

**Source:** Web of Science

**Searched on:** February 11, 2012

**Results/ Citations:** 748

1. Base search: Trento, Passera et al. 2001
2. Base search: (Edelman, Fredrickson et al. 2010)
3. Base search: (Brooks, Rihani et al. 2007)
4. Base search: (Clancy, Cope et al. 2003)
5. Base search: (Culhane-Pera, Peterson et al. 2005)
6. Base search: (Deakin, McShane t al. 2005)

7. "Group Medical Visit"
8. "Shared Medical Appointment"
9. "Diabetic Group Appointment"

**Source:** Psych Info (1887- Present)

**Searched on:** February 12, 2012

**Results:** 124

**Search:**

1. "Group Medical Visit"
2. "Shared Medical Appointments"
3. "Shared Medical"
4. "Diabetic Group Appointment"
5. "Diabetic Group"
6. "Group Appointment"
7. "Chronic Care clinic"
8. "Shared diabetes visit"
9. "Shared group"

**Source:** HSTAT (1977- Present)

**Searched on:** February 12, 2012

**Results:** 131

**Search:**

1. "Group Medical Visit"
2. "Shared Medical Appointment"
3. "Shared Medical" + "Diabetes"
4. "Diabetes Group"
5. "Diabetes clinic"
6. "Chronic care clinic"

**Limits:** Omitted immunology, information science, microbiology, molecular biology, neurosciences, small molecule libraries, viruses

**Source:** Cochrane (CDSR)

**Searched on:** February 12, 2012

**Results:** 25

**Search:**

1. "Shared Medical"
2. "Group Medical Visits"
3. "Group Visits"
4. "Diabetic Group"
5. "Shared Diabetes care"

6. "Diabetes Clinic"
7. "Chronic Care clinic"
8. "GMV"
9. "SMA"
10. "Shared Medical appointment"

**Source:** Google Scholar - Grey literature

**Searched on:** February 12, 2012

**Results:** 470

**Search:**

1. "Shared Medical appointment"
2. "Cooperative healthcare clinic"
3. "Group Medical visit"
4. "Group Medical Clinic"
5. "Diabetic Group Appointment"
6. "Diabetic Group visit"
7. "Group Care diabetes"

**Source:** Clinical Trials

**Searched on:** February 19, 2012

**Results:** 100

**Search:**

1. "Group Medical Visits"
2. "Diabetic Group"
3. "Group Visit"
4. "Group Appointment"
5. "Shared Medical"
6. "Diabetes Clinic"
7. "Diabetes Group"
8. "Diabetes Visit"
9. "Group Medical Appointment"

**Source:** PubMed Health

**Searched on:**

**Results:** 336

**Search:**

1. "Group Medical"
2. "Diabetes group"
3. "Diabetes education"
4. "Shared Medical"
5. "Group Appointment"
